# Supplementary material for: Therapeutic effect optimization and influencing factors of hyperbaric oxygen in the treatment of sudden sensorineural hearing loss
Source: Research Square preprint supplement (doi:10.21203/rs.3.rs-7581092/v1), 2025-10-08
Supplement: Supplementary file 1 [file 66b40361ac96f8eface7ad1a.docx]

**Appendix 1**. List of 4 multi-center hospitals

| **Number** | **Institutes** |
| --- | --- |
| 1 | Putuo Hospital， Shanghai University of Traditional Chinese Medicine |
| 2 | Shanghai Eye and ENT Hospital, Fudan University |
| 3 | Shanghai Ninth People’s Hospital |
| 4 | Xin Hua Hospital Affiliated to Shanghai Jiao Tong University School of Medicine |

**Appendix 2**. Univariate analysis of hearing recovery outcomes.

| Variables | Slight recovery | | Partial recovery | | Complete recovery | |
| --- | --- | --- | --- | --- | --- | --- |
| *P* | OR（95% CI） | *P* | OR（95% CI） | *P* | OR（95% CI） |
| Age(y) | 0.05 | 0.99(0.98-1) | 0.004 | 0.986(0.976-0.995) | 0 | 0.97(0.959-0.981) |
| Time from symptom onset of  SSNHL to treatment (days) | 0 | 0.925(0.895-0.957) | 0.007 | 0.956(0.925-0.988) | 0 | 0.915(0.881-0.951) |
| Initial PTA(dB) | 0.001 | 1.011(1.005-1.017) | 0 | 1.019(1.012-1.025) | 0 | 0.964(0.956-0.971) |
| Sex(male) | 0.998 | 1(0.746-1.34) | 0.457 | 0.897(0.672-1.196) | 0.147 | 1.275(0.918-1.77) |
| Side(no) | 0.261 | 0.845(0.631-1.133) | 0.232 | 0.839(0.629-1.119) | 0.346 | 1.172(0.843-1.628) |
| Vertigo(no) | 0.522 | 1.103(0.816-1.492) | 0.631 | 0.929(0.689-1.254) | 0 | 0.409(0.277-0.603) |
| Tinnitus(no) | 0.189 | 1.217(0.908-1.632) | 0.936 | 0.988(0.741-1.318) | 0.734 | 1.058(0.763-1.468) |
| Classification |  |  |  |  |  |  |
| Low-frequency decline type | 0.133 | 0.377(0.105-1.346) | 0.264 | 0.586(0.229-1.498) | 0.961 | 1.021(0.447-2.333) |
| High-frequency decline type | 0.665 | 1.166(0.581-2.339) | 0.273 | 1.399(0.767-2.552) | 0.92 | 1.034(0.535-1.999) |
| Flat decline type | 0.741 | 0.942(0.66-1.344) | 0.936 | 1.013(0.741-1.384) | 0.44 | 1.132(0.826-1.551) |
| Degree of hearing loss |  |  |  |  |  |  |
| Mild | 0 | 0.071(0.016-0.302) | 0 | 0.073(0.017-0.311) | 0 | 12.718(6.873-23.532) |
| Moderate | 0.015 | 0.477(0.263-0.865) | 0 | 0.077(0.023-0.256) | 0 | 6.121(3.34-11.219) |
| Moderate to severe | 0.254 | 0.755(0.466-1.224) | 0 | 0.306(0.164-0.571) | 0 | 3.346(1.796-6.233) |
| Severe | 0.387 | 0.836(0.557-1.255) | 0.42 | 0.845(0.562-1.271) | 0.005 | 2.352(1.301-4.253) |
| Extremely severe | 0.862 | 1.039(0.677-1.595) | 0 | 2.257(1.53-3.329) | 0 | 3.857(2.15-6.919) |
| HBO course |  |  |  |  |  |  |
| 1-10 | 0.008 | 1.684(1.144-2.478) | 0.079 | 1.407(0.962-2.06) | 1 | 1(0.694-1.441) |
| 11-20 | 0 | 2.731(1.775-4.2) | 0 | 3.123(2.064-4.725) | 0.001 | 0.376(0.215-0.657) |
| ＞21 | 0 | 3.352(1.697-6.622) | 0.001 | 3.141(1.603-6.155) | 0.031 | 0.25(0.071-0.88) |

**Appendix 3.** Univariate analysis of 90 days follow-up of hearing recovery outcomes.

| Variables | Slight recovery | | Partial recovery | | Complete recovery | |
| --- | --- | --- | --- | --- | --- | --- |
| *P* | OR（95% CI） | *P* | OR（95% CI） | *P* | OR（95% CI） |
| Age(y) | 0.089 | 0.991(0.981-1.001) | 0.077 | 0.991(0.98-1.001) | 0 | 0.971(0.96-0.982) |
| Time from symptom onset of SSNHL to treatment (days) | 0 | 0.941(0.913-0.969) | 0.026 | 0.968(0.941-0.996) | 0 | 0.923(0.891-0.956) |
| initial PTA(dB) | 0.006 | 1.009(1.003-1.016) | 0 | 1.018(1.011-1.025) | 0 | 0.962(0.955-0.969) |
| Sex(male) | 0.927 | 0.986(0.73-1.332) | 0.358 | 0.867(0.64-1.175) | 0.237 | 1.222(0.876-1.705) |
| Side(no) | 0.298 | 0.852(0.631-1.151) | 0.382 | 0.873(0.645-1.183) | 0.4 | 1.154(0.826-1.612) |
| Vertigo(no) | 0.674 | 1.068(0.785-1.455) | 0.437 | 0.882(0.644-1.209) | 0 | 0.38(0.256-0.564) |
| Tinnitus(no) | 0.337 | 1.159(0.858-1.566) | 0.562 | 0.914(0.675-1.238) | 0.822 | 0.963(0.691-1.342) |
| Classification |  |  |  |  |  |  |
| Low-frequency decline type | 0.307 | 0.566(0.19-1.688) | 0.303 | 0.563(0.189-1.678) | 0.307 | 0.566(0.19-1.688) |
| High-frequency decline type | 0.808 | 1.081(0.576-2.031) | 0.451 | 0.768(0.387-1.525) | 0.808 | 1.081(0.576-2.031) |
| Flat decline type | 0.514 | 1.114(0.806-1.539) | 0.723 | 1.061(0.766-1.469) | 0.514 | 1.114(0.806-1.539) |
| Degree of hearing loss |  |  |  |  |  |  |
| Mild | 0.001 | 0.081(0.019-0.35) | 0.001 | 0.086(0.02-0.371) | 0 | 14.233(7.492-27.038) |
| Moderate | 0.035 | 0.519(0.282-0.955) | 0 | 0.087(0.026-0.29) | 0 | 6.522(3.501-12.152) |
| Moderate to severe | 0.332 | 0.782(0.475-1.285) | 0 | 0.313(0.164-0.599) | 0 | 3.48(1.845-6.563) |
| Severe | 0.401 | 0.838(0.555-1.266) | 0.186 | 0.749(0.488-1.149) | 0.004 | 2.38(1.309-4.325) |
| Extremely severe | 0.762 | 1.07(0.691-1.657) | 0.001 | 2.007(1.336-3.016) | 0 | 3.885(2.143-7.042) |
| HBO course |  |  |  |  |  |  |
| 1-10 | 0.161 | 1.328(0.893-1.976) | 0.584 | 1.12(0.746-1.68) | 0.243 | 0.799(0.549-1.164) |
| 11-20 | 0.002 | 2.035(1.308-3.167) | 0 | 2.385(1.539-3.694) | 0 | 0.284(0.16-0.504) |
| ＞21 | 0.006 | 2.641(1.33-5.245) | 0.005 | 2.687(1.352-5.341) | 0.011 | 0.195(0.055-0.69) |
